# Supplementary material
Source: publisher figshare collection journal article supplement (https://springernature.figshare.com/ndownloader/files/13812815)
Supplement: Supplementary file 1 [file 13812815]

## Supplementary Files

### **Tspan8 and Tspan8/CD151 knockout mice unravel the contribution of tumor and host exosomes to tumor progression.**

Kun Zhao<sup>1</sup>, Wang Zhe<sup>1</sup>, Thilo Hackert<sup>1</sup>, Claudia Pitzer<sup>2</sup>, Margot Zöller<sup>1</sup>

<sup>1</sup> Pancreas Section, University Hospital of Surgery, <sup>2</sup> Interdisciplinary Neurobehavioral Core, Institute of Pharmacology, Ruprecht-Karls-University, Heidelberg, Germany

|           |                                                                                                            |
|-----------|------------------------------------------------------------------------------------------------------------|
| Table S1  | Primers                                                                                                    |
| Table S2  | Reagents                                                                                                   |
| Figure S1 | Characterization of MCA tumors, bone marrow cells and endothelial cells from Tspan8ko- and/or CD151ko-mice |
| Figure S2 | Tspan8- and CD151-dependence of TEX and sExo delivery and uptake                                           |
| Figure S3 | Ex vivo analysis of tetraspanin, adhesion molecule and angiogenic factor expression in MCA tumors          |
| Figure S4 | TEX and apoptosis resistance of wt- and ko-MCA tumor cells                                                 |
| Figure S5 | The impact of TEX on EMT                                                                                   |
| Figure S6 | TEX proteases and invasion of Tspan8ko and/or CD151ko MCA cells                                            |
| Figure S7 | Flow-cytometry examples on the impact of sExo and TEX uptake on BMC subpopulations                         |

Table S1

**Primers**

|                                    |                        |
|------------------------------------|------------------------|
| Tspan8 genotyping reverse primer 1 | AGTGTGCCTTTCAGCCACTTCC |
| Tspan8 genotyping forward primer 2 | CCCGGAGATGAGGAAGAGGAG  |
| Tspan8 genotyping forward primer 3 | TTTGAAGCGTGCAGAATGCC   |
| CD151 genotyping reverse primer 1  | CAGCTTAGGACCTCTTCTCA   |
| CD151 genotyping forward primer 2  | GCTCCATGTTCCCTGTACACT  |
| CD151 genotyping forward primer 3  | GCCTCTGTTCCACATACACT   |
| CD151 genotyping forward primer 4  | ATGATAACCCACCATGTGTC   |

Table S2

**Reagents**

Table S2A

**Antibodies**

| <b>Antibody</b>                            | <b>Species<sup>a</sup></b> | <b>Supplier</b>              |
|--------------------------------------------|----------------------------|------------------------------|
| ADAM10                                     | rabbit                     | Santa Cruz, HD, G            |
| ADAM17 (TACE)                              | rabbit                     | Santa Cruz, HD, G            |
| ALDH1/2                                    | rabbit                     | Santa Cruz, HD, G            |
| Alix                                       | rabbit                     | Santa Cruz, HD, G            |
| $\beta$ -actin                             | mouse                      | Biozol, Munic, G             |
| $\beta$ -catenin                           | rabbit                     | Becton Dickinson, HD, G      |
| BAD                                        | hamster                    | Becton Dickinson, HD, G      |
| pBAD                                       | rabbit                     | Cell Signaling, Frankfurt, G |
| BAX                                        | rabbit                     | Becton Dickinson, HD, G      |
| Bcl2                                       | rabbit                     | Becton Dickinson, HD, G      |
| BclXI                                      | rabbit                     | Cell Signaling, Frankfurt, G |
| Casp3                                      | rabbit                     | Becton Dickinson, HD, G      |
| Casp8                                      | rabbit                     | Becton Dickinson, HD, G      |
| clv.Casp9                                  | rabbit                     | Cell Signaling, Frankfurt, G |
| CD9                                        | rat                        | Becton Dickinson, HD, G      |
| CD11b (IT $\alpha$ M) (YBM6.6.10)          | rat                        | EACC <sup>a</sup>            |
| CD13                                       | rabbit                     | Santa Cruz, HD, G            |
| CD24 (M1.69)                               | rat                        | EACC                         |
| CD29 (IT $\beta$ 1) (Itg $\beta$ 1) (KMI6) | rat                        | ATCC <sup>b</sup>            |
| CD31 (PECAM1)                              | rat                        | Becton Dickinson, HD, G      |
| CD34                                       | rat                        | Becton Dickinson, HD, G      |
| CD38                                       | sheep                      | R&D Systems, G               |
| CD41 (IT $\alpha$ 2b)                      | rat                        | Becton Dickinson, HD, G      |
| CD44 (IM7)                                 | rat                        | EACC                         |
| CD47 (IAP)                                 | rat                        | Becton Dickinson, HD, G      |
| CD49a (IT $\alpha$ 1)                      | monocl.hamster             | Becton Dickinson, HD, G      |
| CD49b (Itg $\alpha$ 2)                     | monocl.hamster             | Becton Dickinson, HD, G      |
| CD49c (Itg $\alpha$ 3)                     | goat                       | Becton Dickinson, HD, G      |
| CD49d (IT $\alpha$ 4) (PS/2)               | rat                        | R&D Systems, G               |
| CD49e (IT $\alpha$ 5)                      | rat                        | ref 1 <sup>c</sup>           |
| CD49f (IT $\alpha$ 6)                      | rat                        | Becton Dickinson, HD, G      |
| CD54 (ICAM1)                               | monocl.hamster             | ImmunoTools, Friesoythe, G   |
| CD56 (NCAM1)                               | rat                        | Becton Dickinson, HD, G      |
| CD61 (IT $\beta$ 3)                        | monocl.hamster             | ImmunoTools, Friesoythe, G   |
| CD62E (selectin E)                         | rat                        | Becton Dickinson, HD, G      |
| CD62L (selectin L)                         | rat                        | Becton Dickinson, HD, G      |
| CD62P (selectin P)                         | rat                        | ImmunoTools, Friesoythe, G   |
| CD63 (Tspan30)                             | rabbit                     | Becton Dickinson, HD, G      |
| CD81 (Tspan28)                             | monocl.hamster             | Santa Cruz, HD, G            |
| CD95                                       | monocl.hamster             | ImmunoTools, Friesoythe, G   |
| CD95L                                      | monocl.hamster             | Becton Dickinson, HD, G      |
| CD102 (ICAM2)                              | rat                        | Becton Dickinson, HD, G      |
| CD103 (IT $\alpha$ E)                      | rat                        | Becton Dickinson, HD, G      |
| CD104 (IT $\beta$ 4)                       | rat                        | Becton Dickinson, HD, G      |
| CD105 (Endoglin)                           | rat                        | Becton Dickinson, HD, G      |
| CD106 (VCAM1)                              | rat                        | Becton Dickinson, HD, G      |
| CD117 (c-KIT)                              | rat                        | Becton Dickinson, HD, G      |
| CD121a (IL1RI)                             | rat                        | Becton Dickinson, HD, G      |
| CD123 (IL3R)                               | rat                        | Becton Dickinson, HD, G      |
| CD133                                      | goat                       | SantaCruz, HD, G             |
| CD138 (Syndecan)                           | rat                        | Becton Dickinson, HD, G      |
| CD142 (Tissue factor)                      | rabbit                     | Becton Dickinson, HD, G      |
| CD144 (cadherin5)                          | rat                        | Becton Dickinson, HD, G      |
| CD151 (Tspan24)                            | rat                        | R&D Systems, G               |

Table S2A continued

| <b>Antibody</b>       | <b>Species<sup>a</sup></b> | <b>Supplier</b>                   |
|-----------------------|----------------------------|-----------------------------------|
| CD253 (TRAIL)         | rat                        | Biozol, Munic, G                  |
| CD254 (TRANCE)        | rat                        | Biozol, Munic, G                  |
| Coll I                | rabbit                     | Rockland, Gilbertsville, USA      |
| Coll IV               | rabbit                     | Rockland, Gilbertsville, USA      |
| CXCL12 (SDF1)         | rabbit                     | abcam, Cambridge, UK              |
| CXCR4 (CD184)         | rat                        | Becton Dickinson, HD, G           |
| EphA4                 | rabbit                     | SantaCruz, HD, G                  |
| FGFR3                 | rabbit                     | Cell Signaling, Frankfurt, G      |
| FN                    | mouse                      | Becton Dickinson, HD, G           |
| FOXO3                 | rabbit                     | SantaCruz, HD, G                  |
| FRIZZLED              | rabbit                     | SantaCruz, HD, G                  |
| GMCSF                 | rat                        | Becton Dickinson, HD, G           |
| Gr1                   | rat                        | ImmunoTools, Friesoythe, G        |
| HSP70                 | rabbit                     | BioTrend, Cologne, G              |
| HSP90                 | mouse                      | BioTrend, Cologne, G              |
| IL1 $\beta$           | rat                        | BioTrend, Cologne, G              |
| IL3                   | rat                        | Becton Dickinson, HD, G           |
| Lamp1                 | rat                        | Becton Dickinson, HD, G           |
| LIF                   | rabbit                     | SantaCruz, HD, G                  |
| LN $\alpha$ 1         | rabbit                     | Rockville, Gilbertsville, PA      |
| LN $\gamma$ 2         | rabbit                     | Rockville, Gilbertsville, PA      |
| Lyve                  | rabbit                     | SantaCruz, HD, G                  |
| MCSFR (CD115)         | rat                        | Bio Rad, Munich, G                |
| MDR1                  | rabbit                     | SantaCruz, HD, G                  |
| MMP2                  | rabbit                     | Dianova, Hamburg, G               |
| MMP3                  | rabbit                     | SantaCruz, HD, G                  |
| MMP7                  | rabbit                     | SantaCruz, HD, G                  |
| MMP9                  | rabbit                     | Dianova, Hamburg, G               |
| MMP14                 | rabbit                     | SantaCruz, HD, G                  |
| Nanog                 | rabbit                     | SantaCruz, HD, G                  |
| N-Cadherin            | mouse                      | Becton Dickinson, HD, G           |
| NOTCH                 | mouse                      | Biolegend, San Diego, Ca, US      |
| Oct3                  | rabbit                     | SantaCruz, HD, G                  |
| OPN                   | rabbit                     | BioTrend, Cologne, G              |
| Podoplanin            | hamster                    | Biozol, Munic, G                  |
| S100A4                | rabbit                     | abcam, Cambridge, UK              |
| SCA1 (Ly6A)           | rat                        | Becton Dickinson, HD, G           |
| SCF (KITL)            | rat                        | Bio Rad, Munich, G                |
| Slug                  | rabbit                     | SantaCruz, HD, G                  |
| Snail                 | rabbit                     | SantaCruz, HD, G                  |
| Sox2                  | rabbit                     | SantaCruz, HD, G                  |
| Ter119                | rat                        | Becton Dickinson, HD, G           |
| TGF $\beta$ 1         | rat                        | Becton Dickinson, HD, G           |
| Thrombospondin        | rabbit                     | SantaCruz, HD, G                  |
| TNF $\alpha$          | rat                        | Becton Dickinson, HD, G           |
| TNFR1 (CD120a)        | hamster                    | Becton Dickinson, HD, G           |
| TNFR2 (CD120b)        | rabbit                     | SantaCruz, HD, G                  |
| TSG101                | rabbit                     | SantaCruz, HD, G                  |
| TSP1                  | rabbit                     | SantaCruz, HD, G                  |
| Tspan8                | rabbit/rat                 | home made/R&D Systems, G          |
| Twist                 | rabbit                     | Becton Dickinson, HD, G           |
| uPA                   | rabbit                     | American Diagnostica, Stamford, G |
| uPAR                  | rabbit                     | American Diagnostica, Stamford, G |
| VEGFR1                | rabbit                     | Dianova, Hamburg, G               |
| VEGFR2 (CD309) (FLK1) | rabbit                     | Dianova, Hamburg, G               |
| VEGFR3 (FLT4)         | rat                        | Becton Dickinson, HD, G           |
| Vimentin              | mouse                      | Becton Dickinson, HD, G           |
| vWF                   | rabbit                     | abcam, Cambridge, UK ZAP70        |

Table S2A continued

| <b>Antibody</b>                                          | <b>Species<sup>a</sup></b> | <b>Supplier</b>                     |
|----------------------------------------------------------|----------------------------|-------------------------------------|
| Wnt1                                                     | rabbit                     | Santa Cruz, Heidelberg, G           |
| Wnt5a                                                    | rabbit                     | Santa Cruz, Heidelberg, G           |
| ZEB1                                                     | rabbit                     | SantaCruz, HD, G                    |
| dye or biotin labeled secondary antibodies /Streptavidin |                            | Dianova, Becton Dickinson, Amersham |

Table S2B  
**Chemicals**

| <b>Matrix proteins</b>     | <b>Dose</b>           | <b>Supplier</b>                                            |
|----------------------------|-----------------------|------------------------------------------------------------|
| Coll I                     | 10µg/ml               | Sigma, Munic, G                                            |
| Coll IV                    | 10µg/ml               | Sigma, Munic, G                                            |
| FN (Fibronectin)           | 2µg/ml                | Sigma, Munic, G                                            |
| LN 111                     | 1µg/ml                | Sigma, Munic, G                                            |
| LN332                      | 10µg/ml               | 804G, exosome-depleted culture supernatant w/o FCS (ref.2) |
| <b>Chemicals</b>           | <b>Dose</b>           | <b>Supplier</b>                                            |
| AnnexinV-FITC / APC        | 0.2µl-0.5µl           | Becton Dickinson, HD, G                                    |
| Heparin                    | 10U/ml                | Radiopharm, Ulm, G                                         |
| Latex beads 4µm            |                       | Invitrogen, Karlsruhe, G                                   |
| Lymphoprep                 |                       | GIBCO, Darmstadt, G                                        |
| MCA (3-methylcholanthrene) | 30µl, 0.5% sol., i.m. | Sigma Aldrich, Heidelberg, G                               |
| Matrigel                   | 1:5 dilution          | Becton Dickinson, HD, G                                    |
| PI                         | 0.08µg                | Becton Dickinson, HD, G                                    |
| SP-Dio <sub>18</sub> (3)   | 1:1000 dilution       | Invitrogen, Karlsruhe, G                                   |
| Transferrin                | 1:100                 | Sigma, Munic, G                                            |

<sup>a</sup> EACC: European Collection of Animal Cell Cultures<sup>b</sup> ATCC: American Type Cell Culture Collection<sup>c</sup> References

1. Hession C, Moy P, Tizard R, Chisholm P, Williams C, Wysk M, et al. Cloning of murine and rat vascular cell adhesion molecule-1. Biochem Biophys Res Commun. 1992;183:163-9.
2. Izumi K, Hirao Y, Hopp L, Oyasu R. In vitro induction of ornithine decarboxylase in urinary bladder carcinoma cells. Cancer Res. 1981;41:405-9.

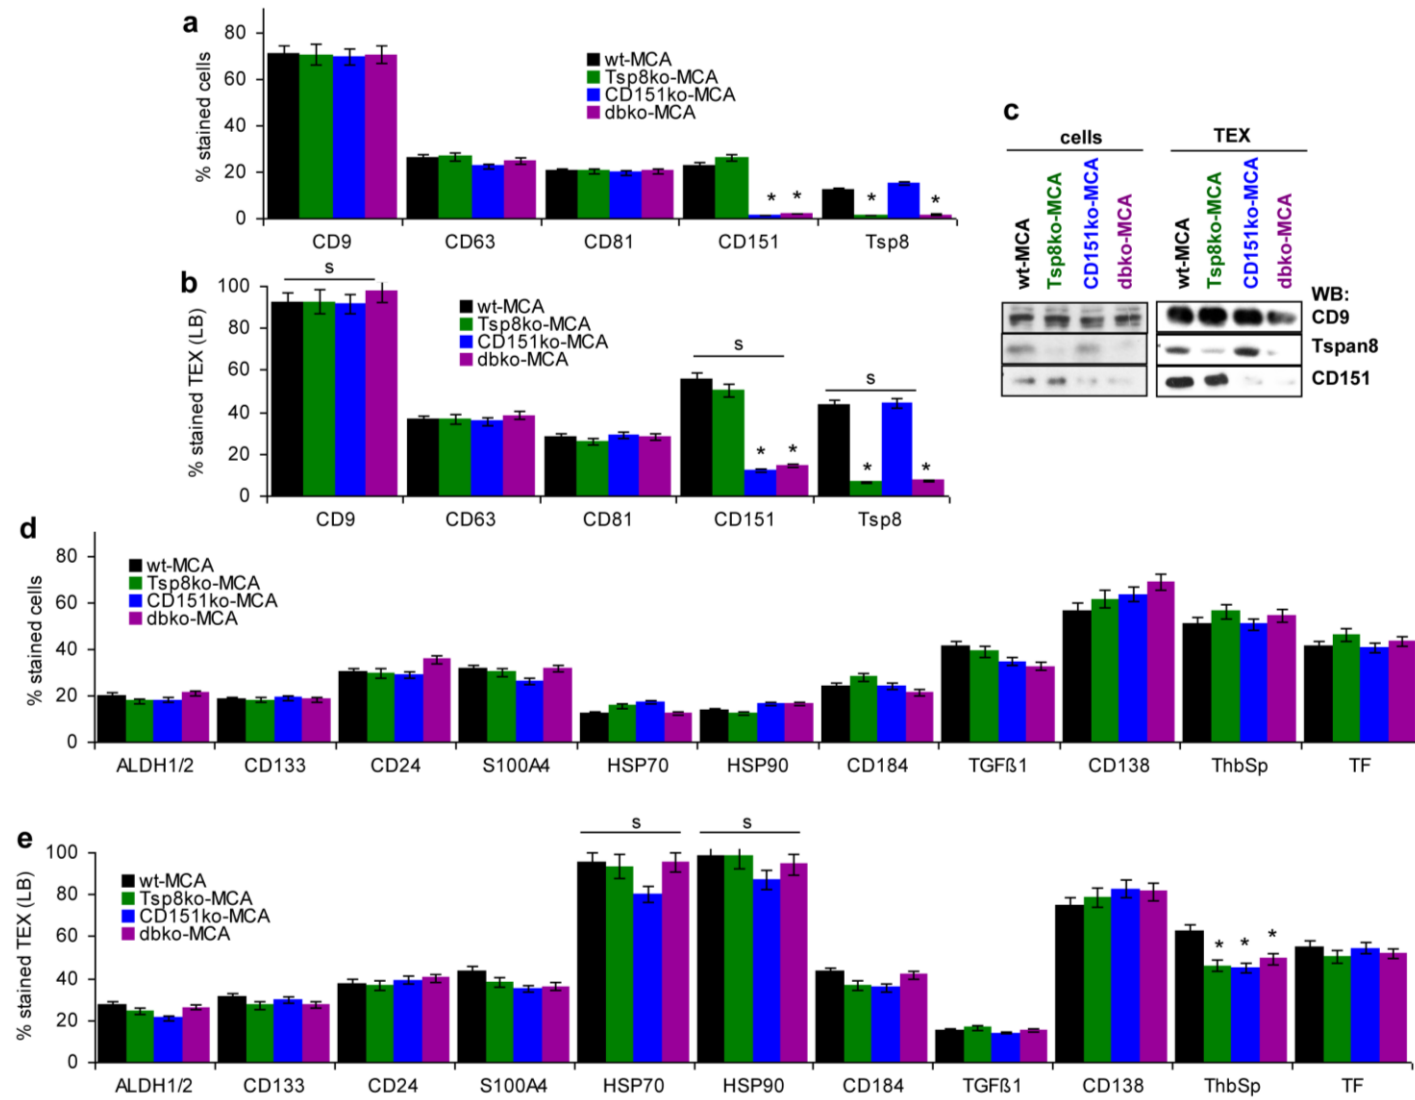

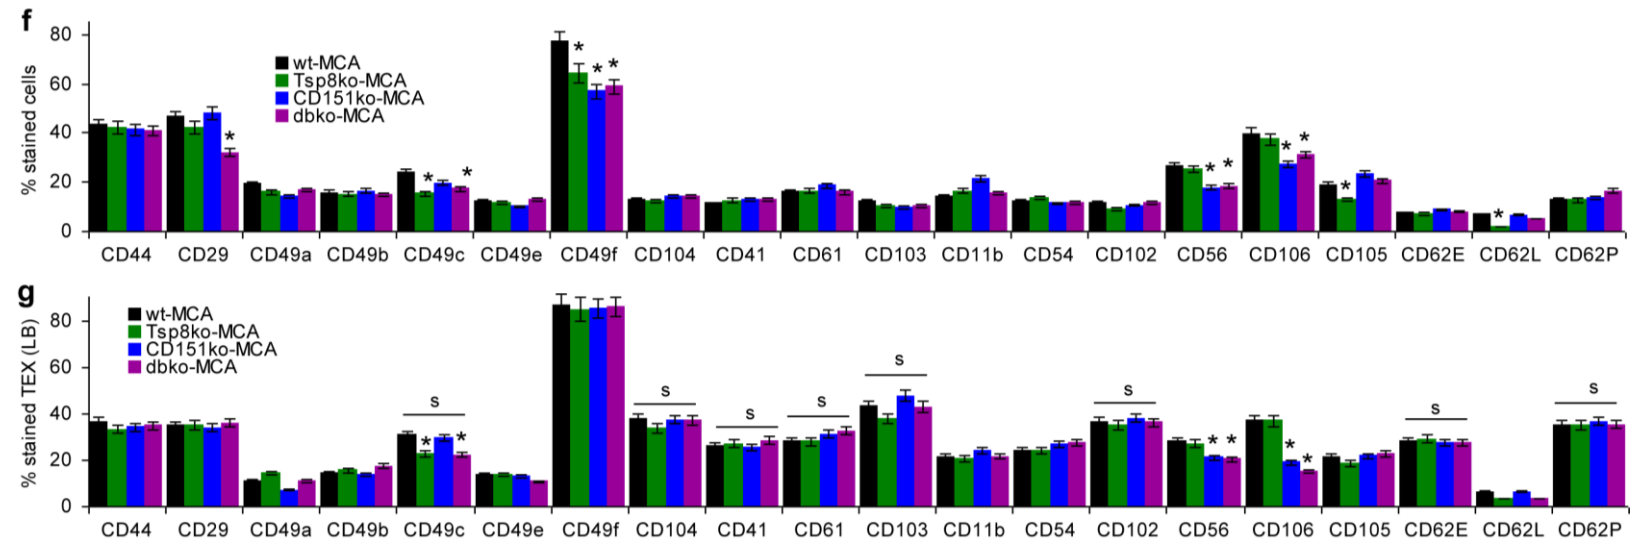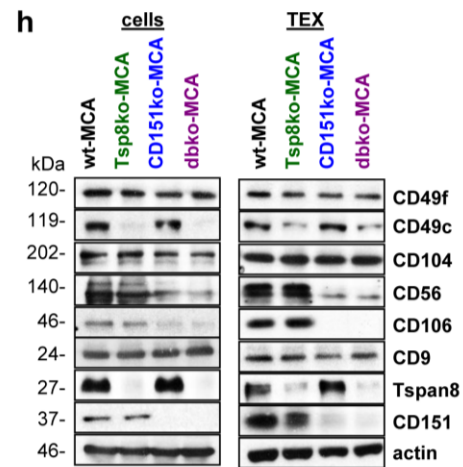

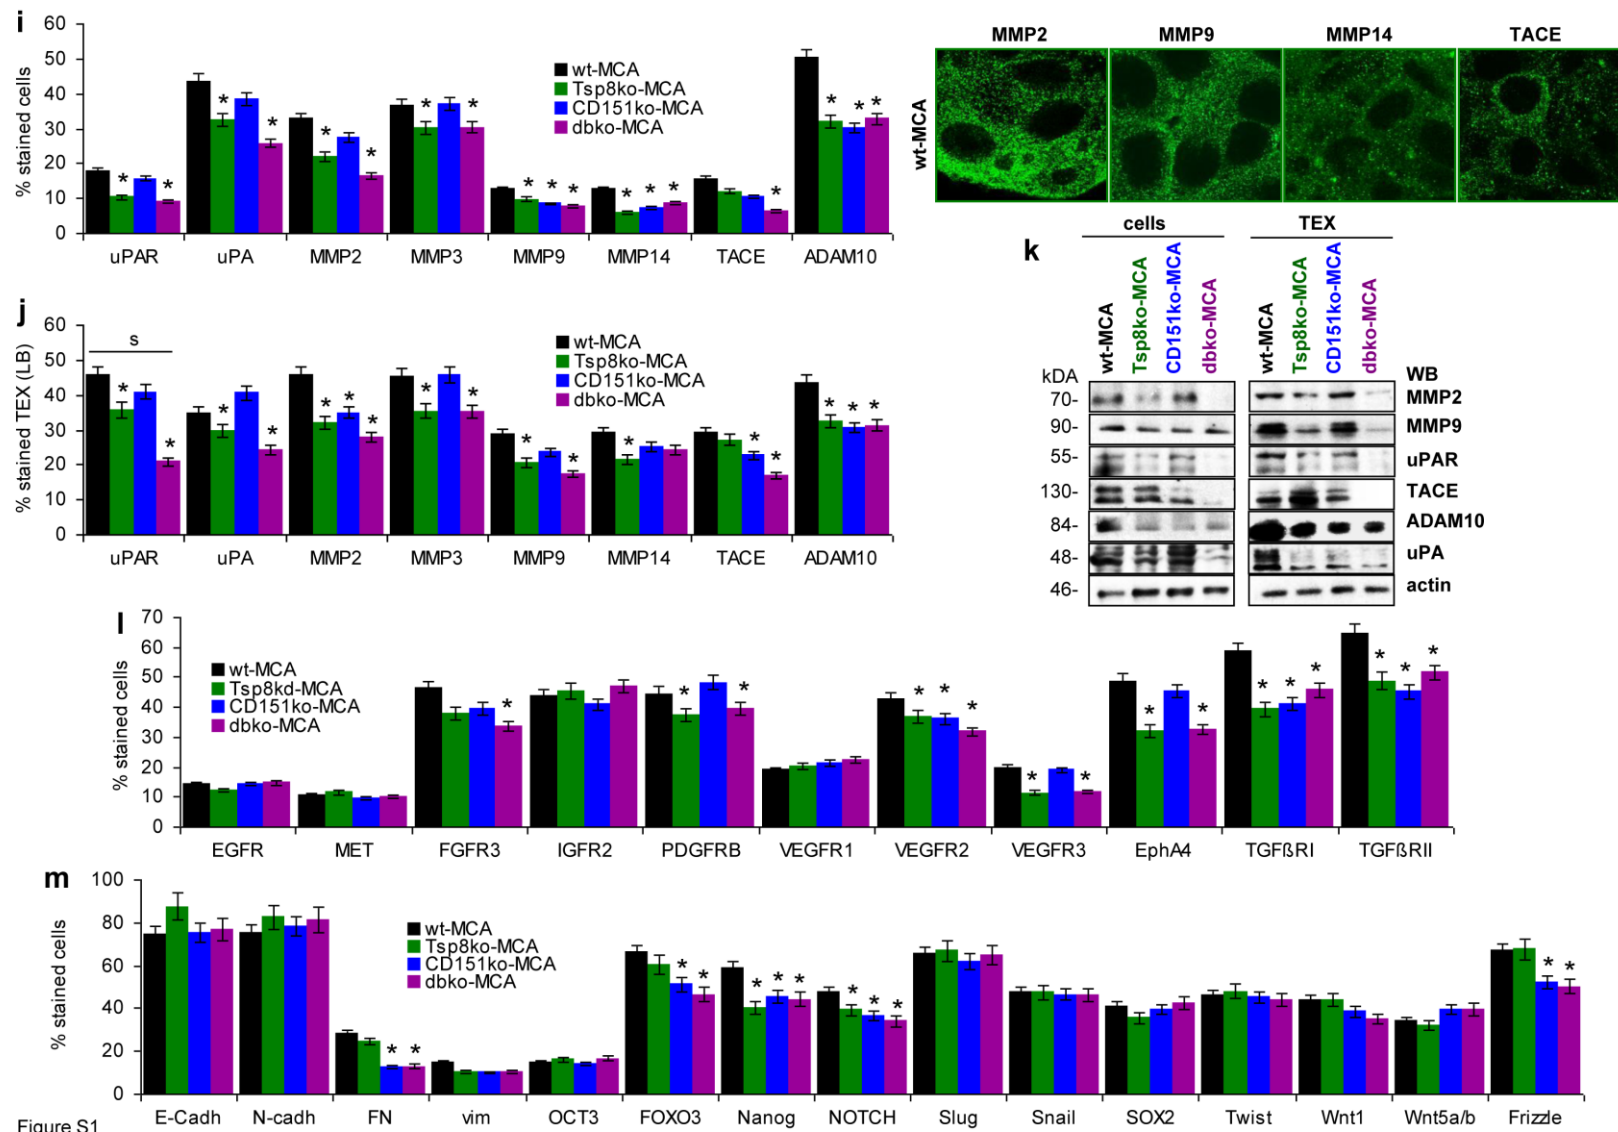

Figure S1



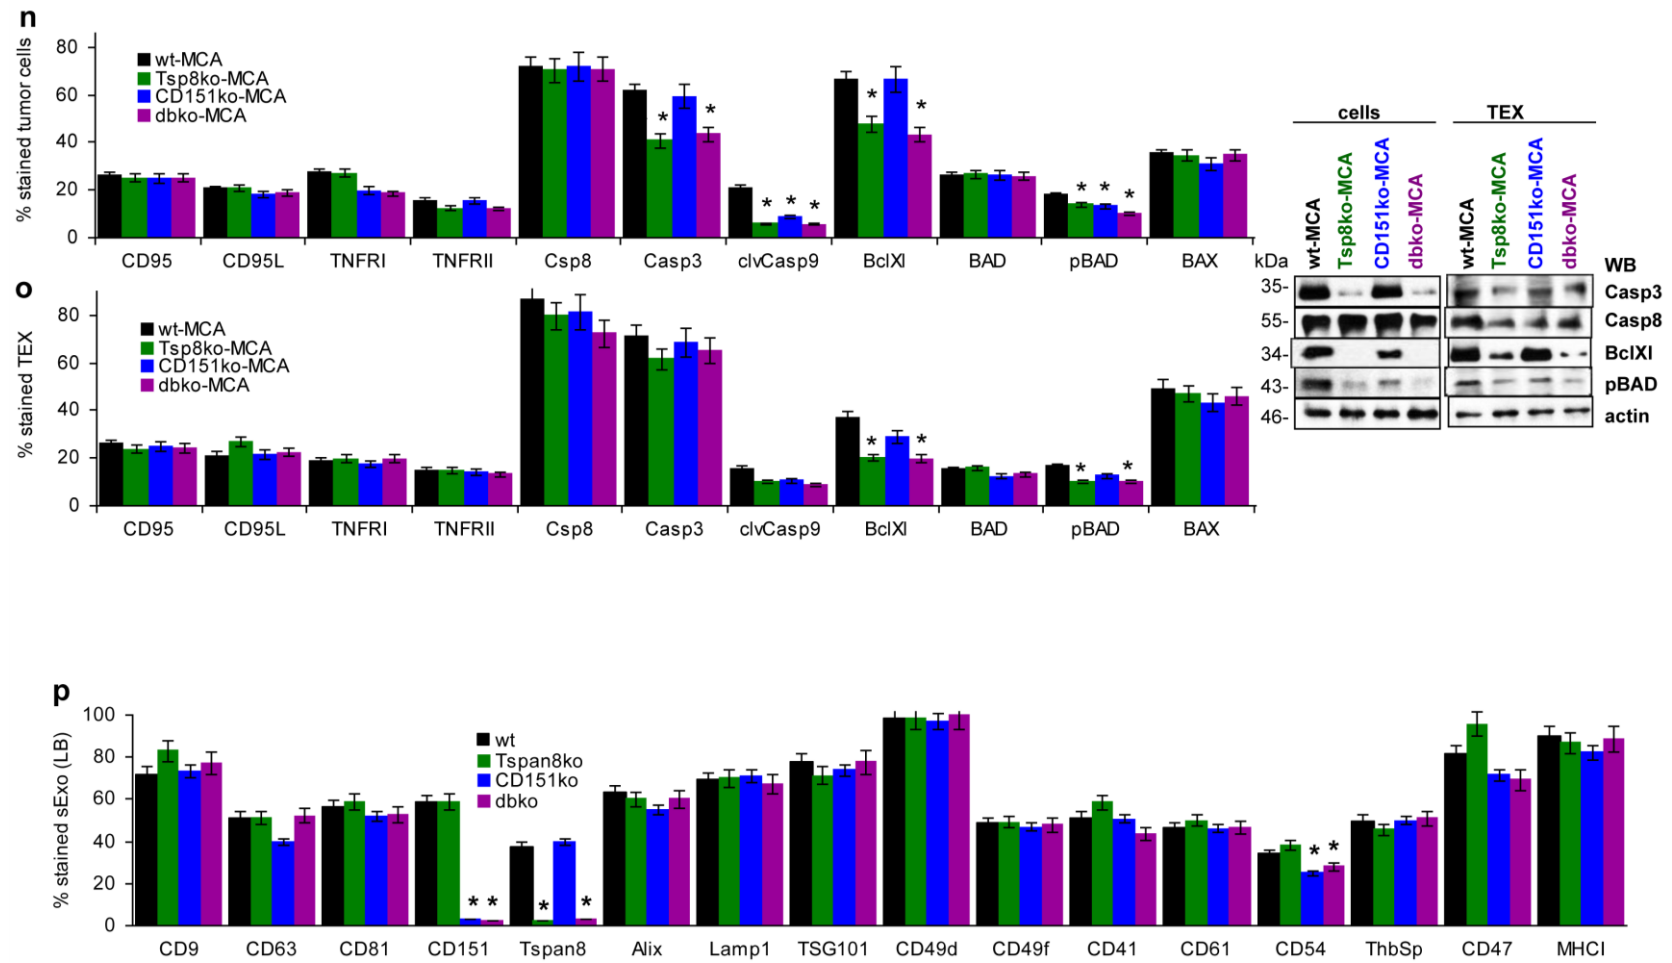

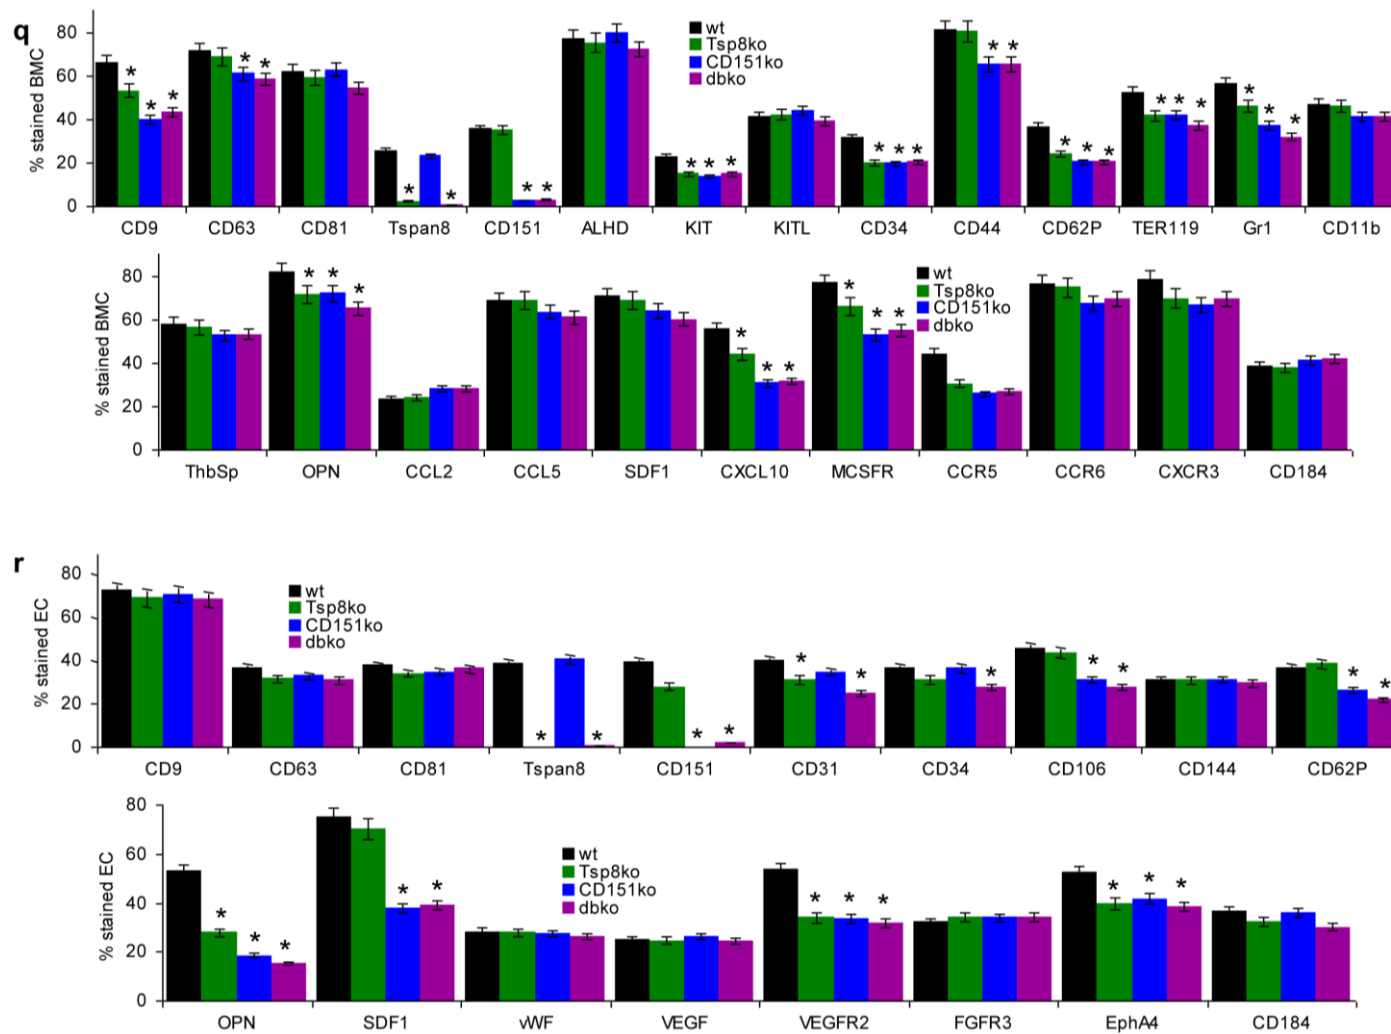

**Figure S1 Characterization of MCA tumors, bone marrow cells and endothelial cells from Tspan8ko- and/or CD151ko-mice.** (a,b) Flow-cytometry evaluation of tetraspanin expression in wt- and ko-MCA tumor cells and TEX and (c) confirmation by WB; (d,e) flow-cytometry evaluation of common tumor markers in wt- and ko-MCA tumor cells and TEX; (f,g) flow-cytometry evaluation of adhesion molecules in wt- and ko-MCA tumor cells and TEX and (h) confirmation by WB; (i,j) flow-cytometry evaluation of proteases in wt- and ko-MCA tumor cells and TEX including examples of confocal microscopy and (k) confirmation by WB; (l) flow-cytometry evaluation of oncogenic receptors in wt- and ko-MCA tumor cells; (m) flow-cytometry evaluation of EMT markers and transcription factors in wt- and ko-MCA tumor cells; (n,o) flow-cytometry evaluation of apoptosis markers in wt- and ko-MCA tumor cells and TEX and confirmation by WB; (p) flow-cytometry evaluation of tetraspanins and Exo markers in sExo; (q) flow-cytometry evaluation of tetraspanins and hematopoietic markers in wt- and ko-BMC; (r) flow-cytometry evaluation of tetraspanins and endothelial cell markers in wt- and ko-EC. Flow cytometry values represent the mean % stained cells / TEX or sExo $\pm$ SD (3assays); significant differences between wt- and ko-cells, TEX and sExo: \*, significant differences between cells and TEX: s.

Tumor marker and sExo marker expression are not severely affected by the Tspan8ko and/or CD151ko. Only ThbSp expression is slightly reduced in ko-TEX. Ko MCA cells and TEX differed in few adhesion molecules, only CD56 and CD106 expression being reduced in CD151ko- and dbko- and CD49c in Tspan8ko- and dbko-MCA cells and TEX. Oncogenic receptors, EMT and apoptosis markers were hardly affected, but protease expression frequently was reduced in ko-MCA cells and TEX. In BMC differences in hematopoietic progenitor markers were dominating. In EC some angiogenic factors and receptors were recovered at a reduced level in ko cells. Differences in expression were mostly weak, but observed in cells and TEX. Only some of the differences were restricted to either Tspan8ko- or CD151ko-cells / TEX.

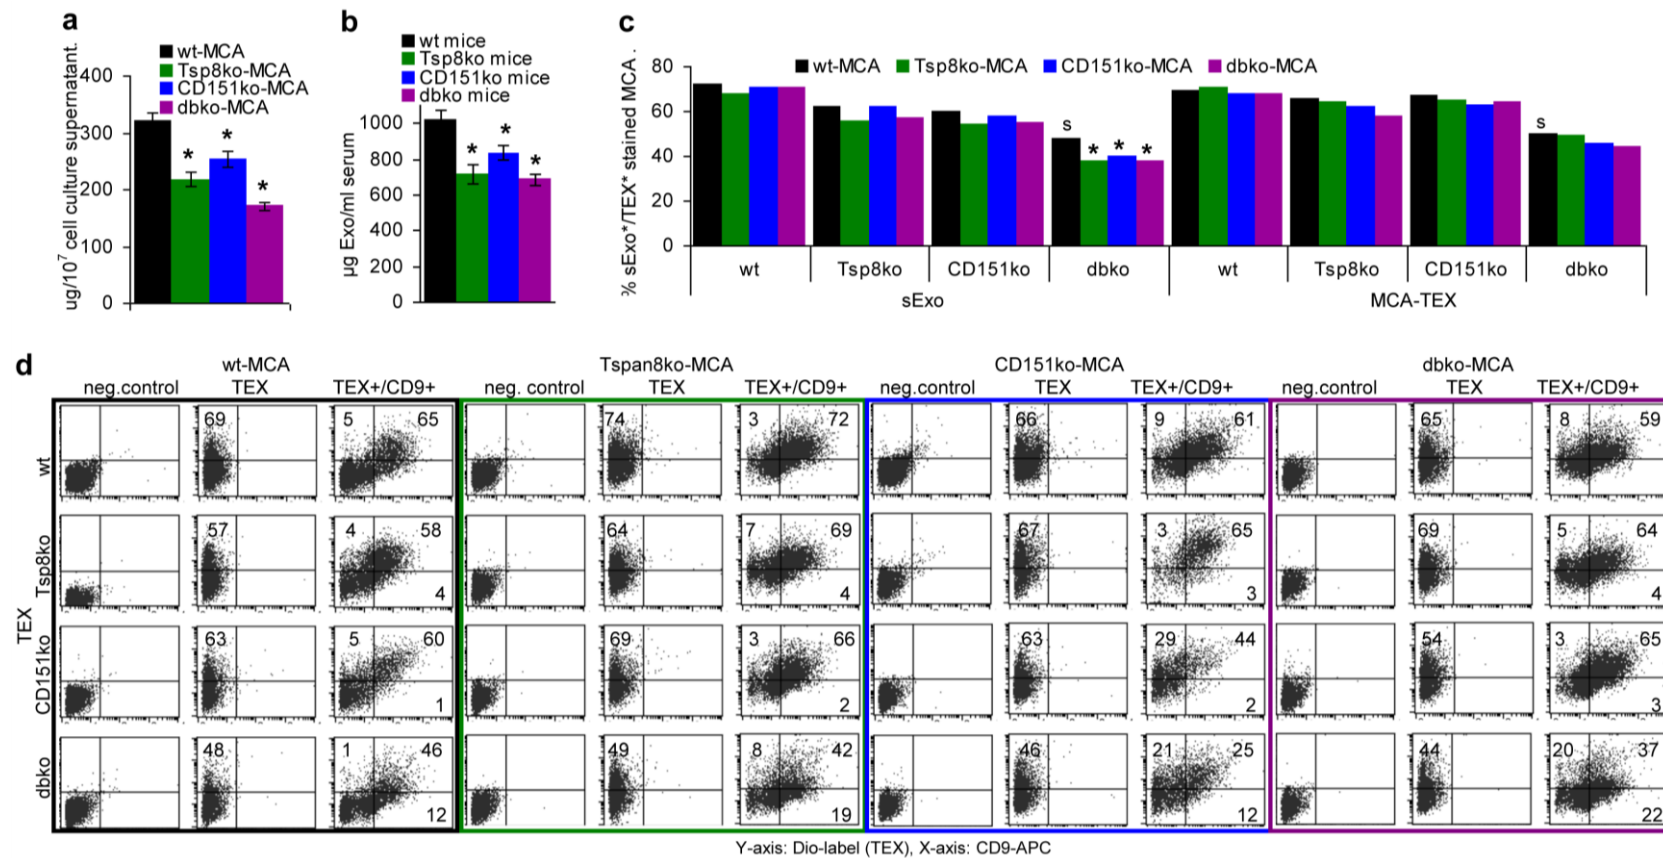

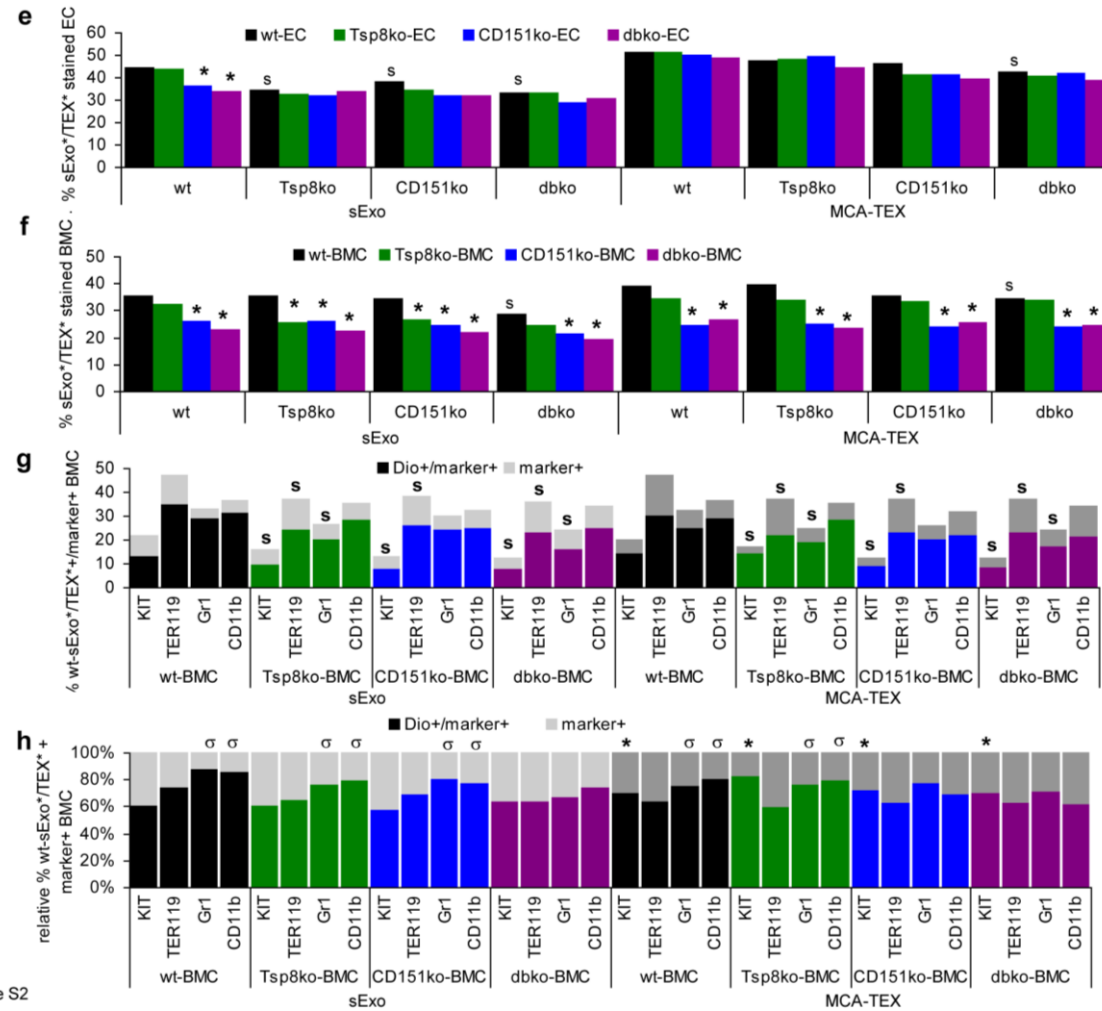

Figure S2

**Figure S2 Tspan8- and CD151-dependence of TEX and sExo delivery and uptake.** (a) TEX were collected from wt- and ko-MCA tumors after 48h culture in the absence of FCS; the amount of TEX/ $10^7$  cells was evaluated by Bradford; mean  $\mu\text{g}/10^7$  cells $\pm$ SD of 3 cultures; significant differences between wt- and ko-TEX: \*; (b) wt and ko mice were bled by heart puncture. Plasma was separated from cells by centrifugation and was subjected to Exo purification; mean  $\mu\text{g}/\text{ml}\pm$ SD of 5 samples/group; significant differences between wt- and ko-sExo: \*; (c,e,f) Dio-labeled sExo and TEX uptake by MCA tumor cells, EC and BMC; the mean percent (triplicates) sExo+/TEX+ cells is shown; significant differences between wt- and ko-sExo/TEX are indicated by s; significant differences between wt- versus ko-acceptor cells are indicated by \*; (d) wt- and ko-MCA were incubated with Dio-labeled wt- and ko-TEX and counterstained with anti-CD9-APC; representative examples and the mean % of Dio+/CD9+ and Dio-/CD9+ cells are shown; (g,h) wt- and ko-BMC were incubated with Dio-labeled wt-sExo and -TEX and counterstained for the indicated markers; in (g) the percent of Dio+/marker+ and Dio-/marker+ BMC is shown; differences in the uptake by ko-BMC compared to wt-BMC: s; (h) the experiment shown in (g) was evaluated according to the percent of Dio-labeled subpopulations, differences between subpopulations:  $\sigma$ , differences between sExo and TEX: s.

Ko MCA cells deliver less TEX and ko mice deliver less sExo. Only dbko-sExo and -TEX uptake is impaired in MCA, cells, EC and BMC. BMC subpopulations differ slightly in uptake being strongest in myeloid progenitors. Furthermore, KIT+ cells take up TEX more readily than sExo.

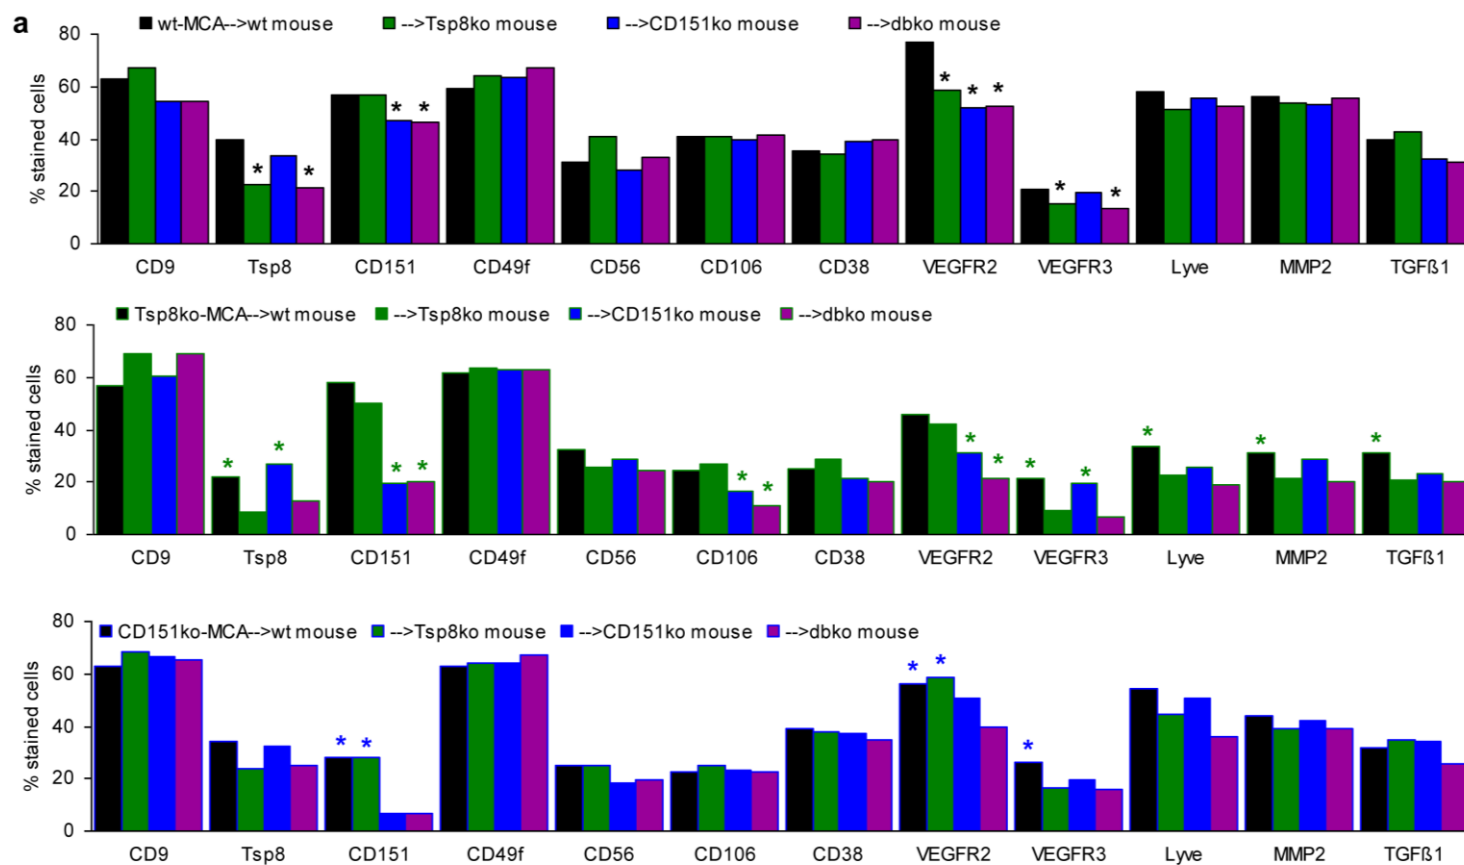



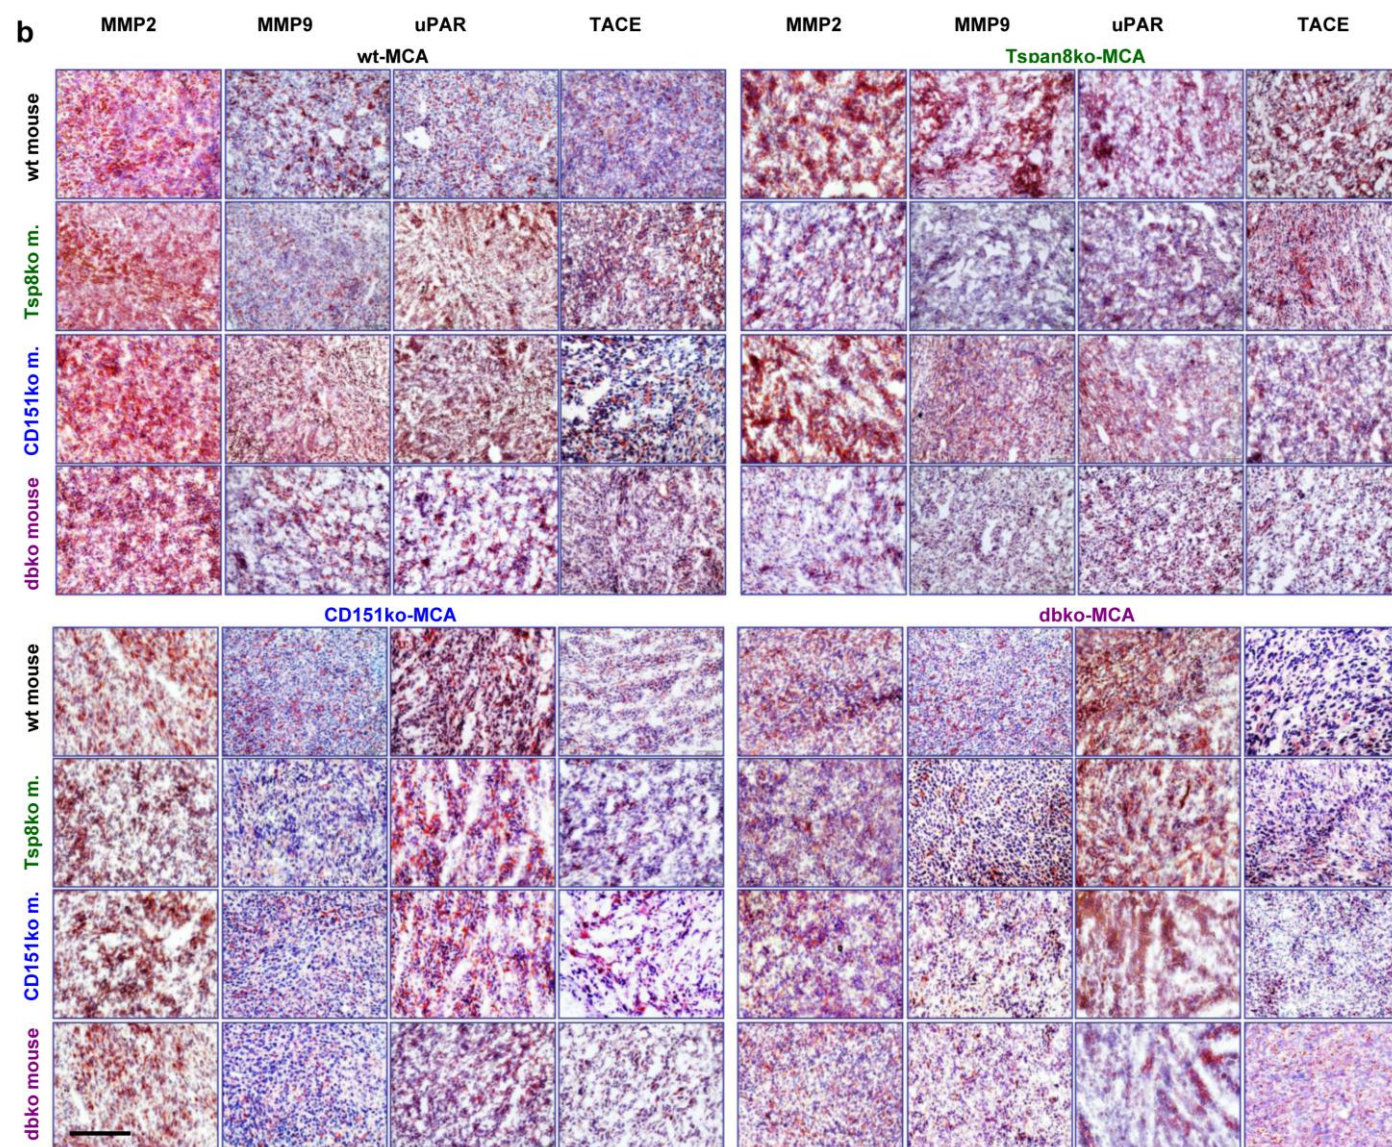



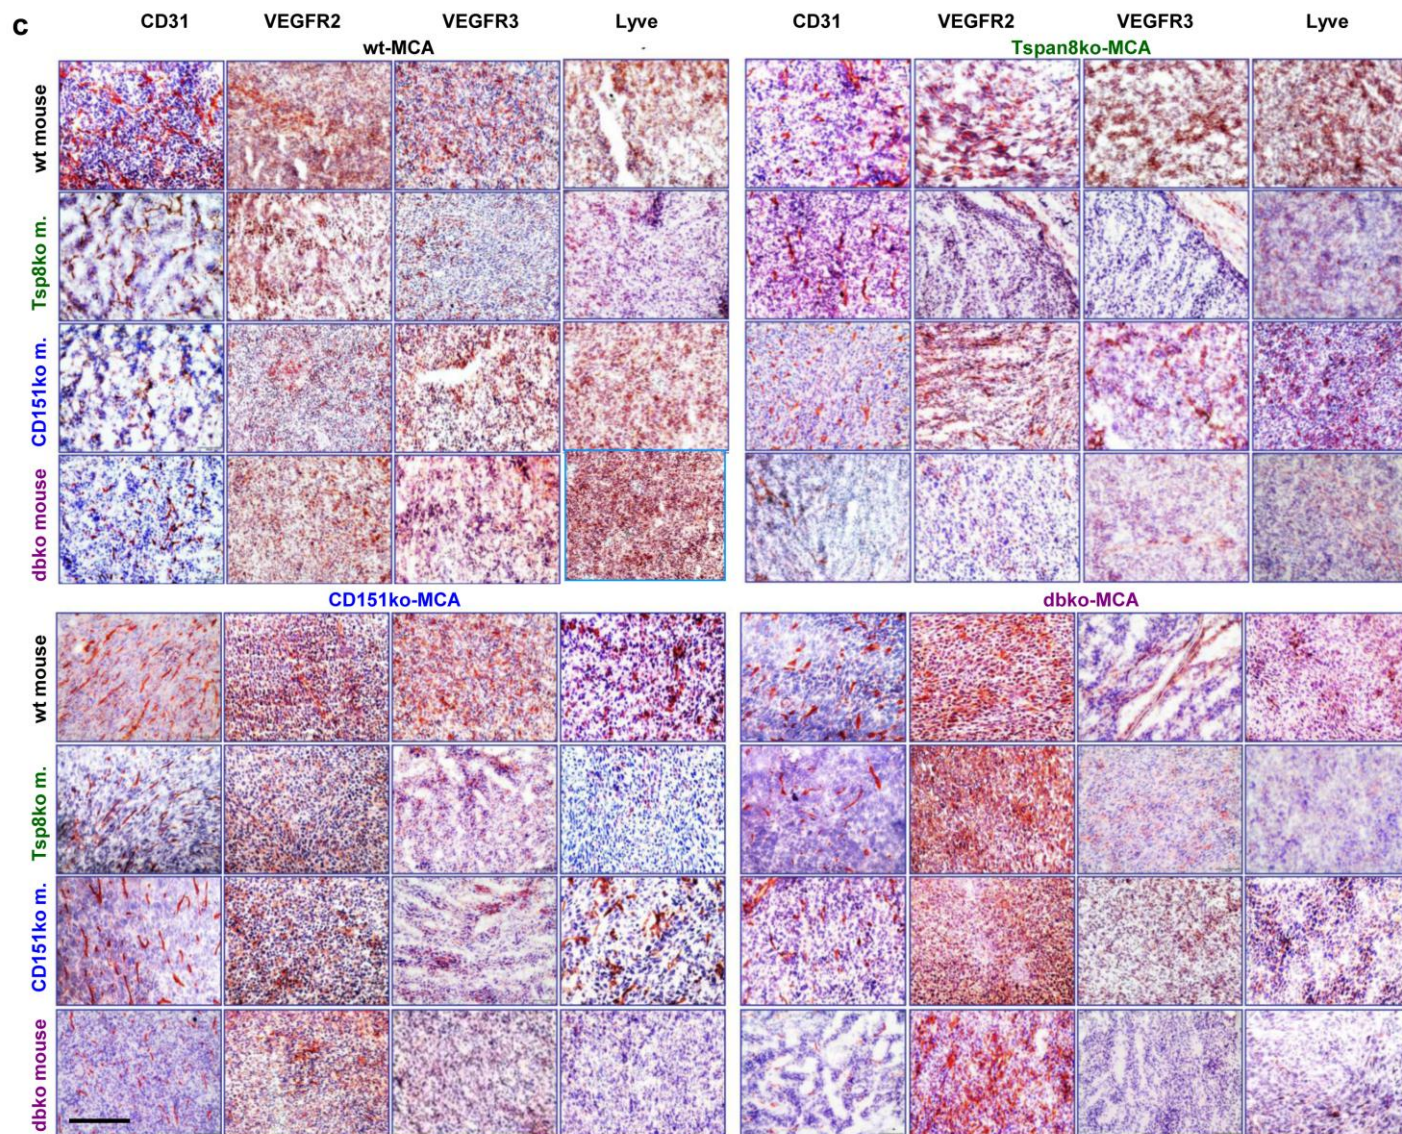

**Figure S3 Ex vivo analysis of tetraspanin, adhesion molecule and angiogenic factor expression in MCA tumors.** (a) At autopsy, wt, Tspan8ko and CD151ko tumor tissue after growth in wt- and ko-mice was meshed and analyzed by flow-cytometry for expression of the indicated markers. Mean % stained cells (3 mice/group) are shown; significant differences to the syngeneic, non-autochthonous host: \*. (b,c) Immunohistochemistry examples of protease and angiogenesis-related marker expression in shock frozen tumor sections (scale bar: 100µm). Flow-cytometry uncovered an impact of the host on Tspan8, CD151, VEGFR2, VEGFR3, Lyve, MMP2 and TGFβ1 expression. The impact of the host was most pronounced in Tspan8ko MCA tumors. Immunohistochemistry confirmed the impact of the host on protease with a particularly strong increase in MMP2 and MMP9 in Tspan8ko-MCA grown in wild type mice. Angiogenesis was most strongly increased in CD151ko-MCA grown in wt mice and VEGFR3 and Lyve in Tspan8ko-MCA grown in wt mice.

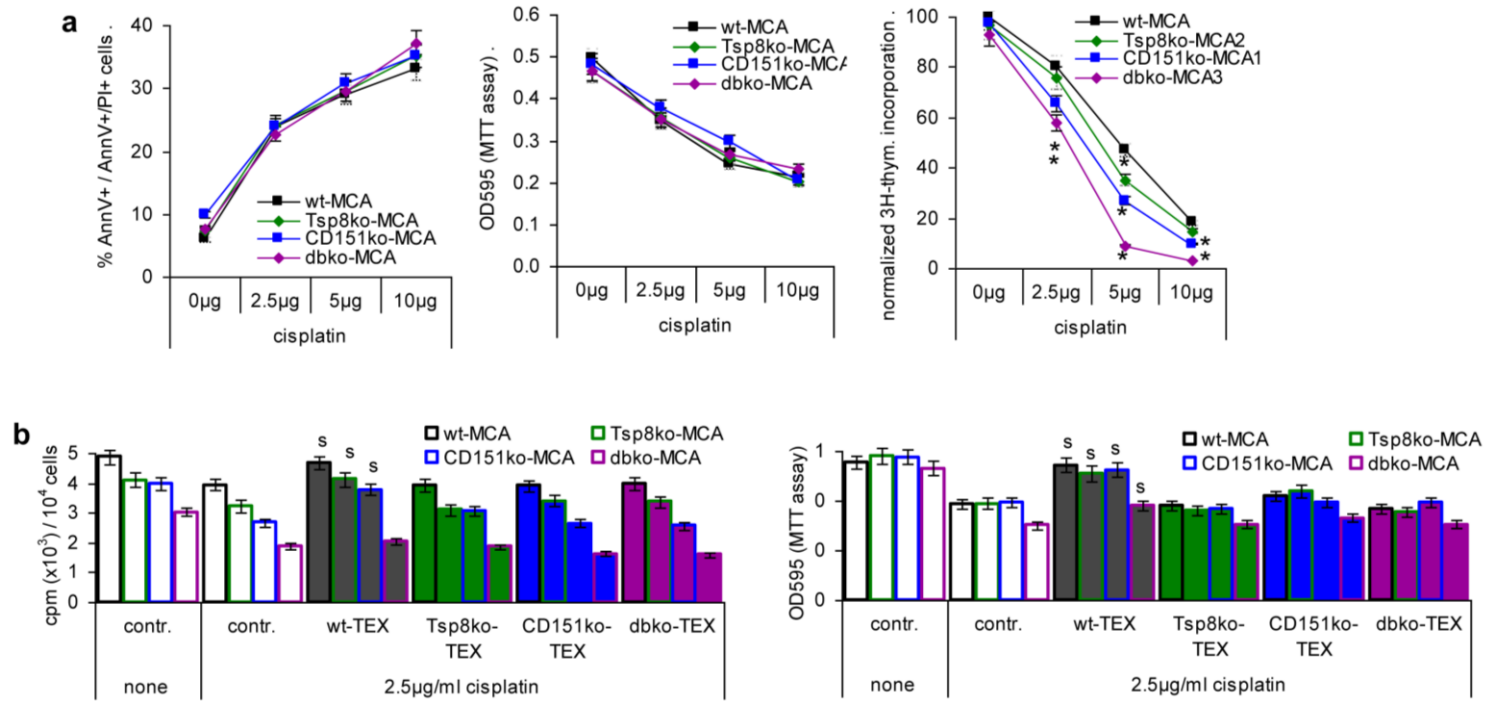

Figure S4 **TEX and apoptosis resistance of wt- and ko-MCA tumor cells.** (a) Apoptosis susceptibility of wt- and ko-MCA cells was evaluated after 48h culture in the presence of increasing doses of cisplatin by AnnV and PI staining (% AnnV+ and AnnV+/PI+ cells), by the MTT assay (mitochondrial integrity) and 3H-thymidine uptake; mean values±SD of triplicates are shown; significant differences between wt- and ko-MCA cells: \*. (b) proliferation and MTT assay of cisplatin-treated (2.5µg/ml) wt- and ko-MCA cells cultured in the absence or presence of wt- and ko-TEX; mean cpm/10<sup>4</sup> cells±SD and mean OD±SD (triplicates); significant differences in the presence of TEX: s. High apoptosis susceptibility of these MCA tumors is not significantly affected by a Tspan8ko and/or a CD151ko and only wt-TEX support wt-, Tspan8ko- and CD151ko-MCA tumor cell proliferation in the presence of cisplatin.



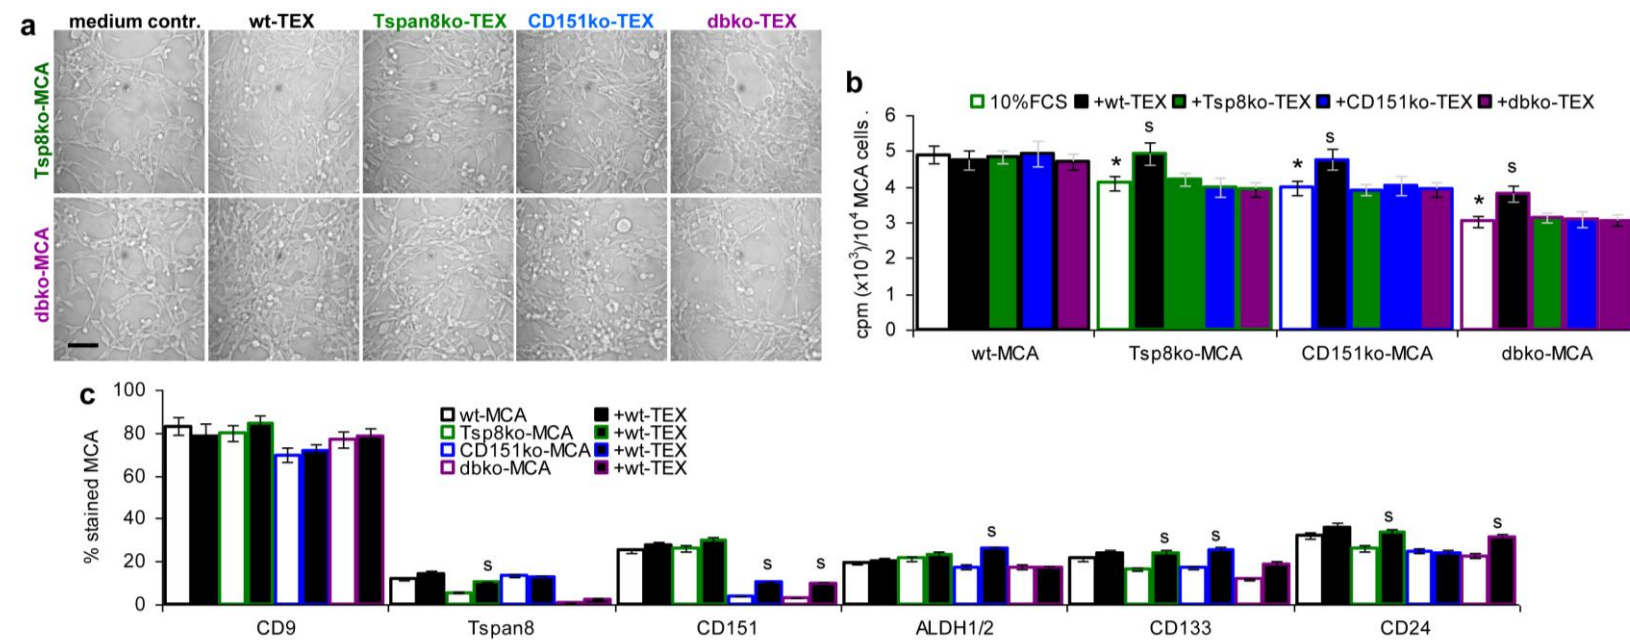

**Figure S5 The impact of TEX on EMT.** (a) Tspan8ko- and dbko-MCA cells were seeded at low density in 6-well plates in the absence or presence of wt- and ko-TEX. Cell density and morphological appearance was evaluated after 72h by light microscopy (scale bar: 100 $\mu$ m); (b) Proliferation (3H-thymidine incorporation) of wt- and ko-MCA cells in the presence or absence of wt- and ko-TEX (30 $\mu$ g/ml); mean cpm/ $10^4$  cells $\pm$ SD (triplicates); significant differences between wt- and ko-MCA cells: \*, significant differences in the absence versus presence of TEX: s. (c) WT- and ko-MCA cells were cocultured with wt-TEX for 48h; flow-cytometry analysis of tetraspanins and stem cell markers expression; the mean % stained cells $\pm$ SD (3 replicates); significant differences by coculture with TEX: s. Despite a slight shift towards a more fibroblastoid phenotype, proliferative activity does not strongly vary between wt- and ko-MCA tumors and only wt-TEX slightly promote proliferation. Only wt TEX support stem cell marker CD133 and CD24 expression.

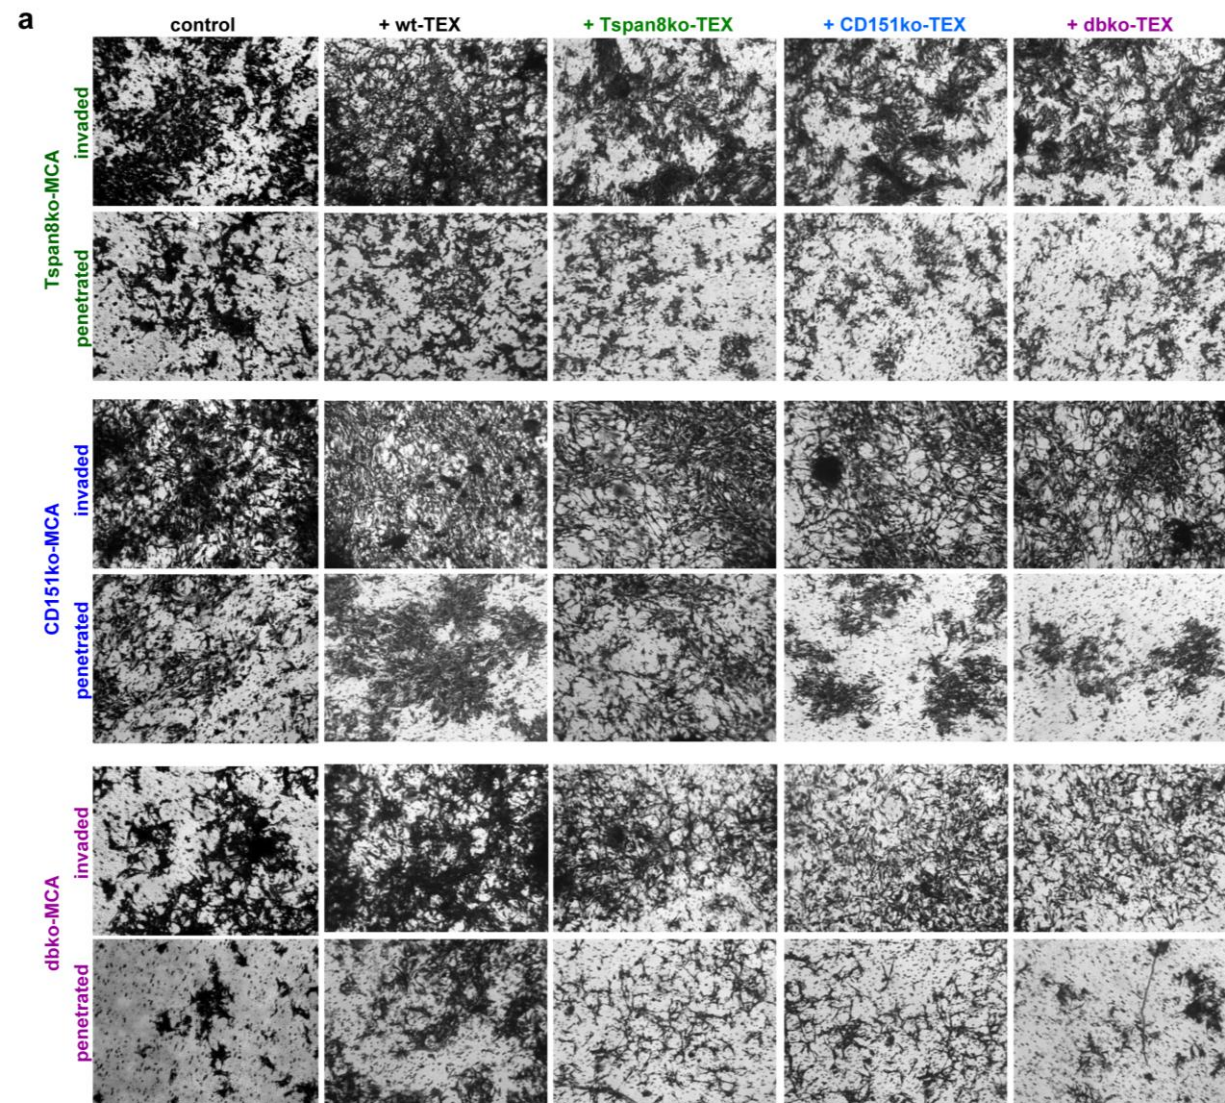

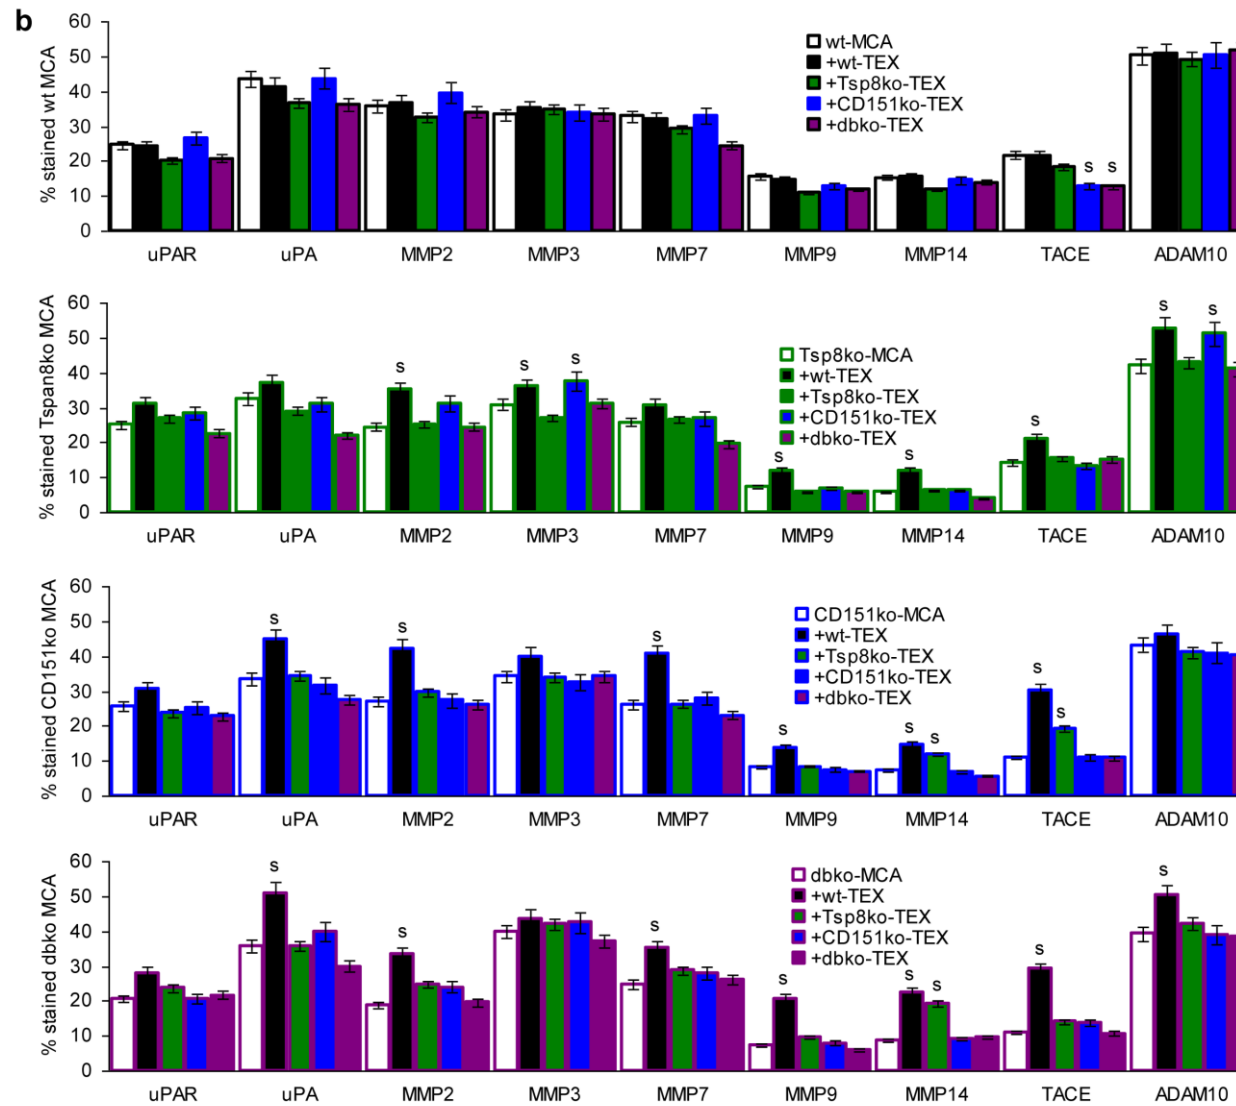

Figure S6 **TEX proteases and invasion of Tspan8ko and/or CD151ko MCA cells.** (a) Tspan8ko-, CD151ko- and dbko-MCA cells were seeded on matrigel containing 50 $\mu$ g/ml TEX. After 48h cells on top of the matrigel were removed and cell within the matrigel (invading) and cells on the lower membrane site were stained with crystal violet; representative examples are shown; (b) wt- and ko-MCA cells were cocultured with wt- and ko-TEX. After 48h expression of proteases was evaluated by flow-cytometry; mean % stained cells $\pm$ SD (triplicates) are shown; significant changes in protease expression in TEX-treated cells: s. Only wt-TEX strongly support ko-MCA cell invasion, which is accompanied by upregulation of MMPs, ADAM10 and TACE mostly in Tspan8ko-MCA cells; only in CD151ko- and dbko-MCA cells uPA expression also becomes upregulated.



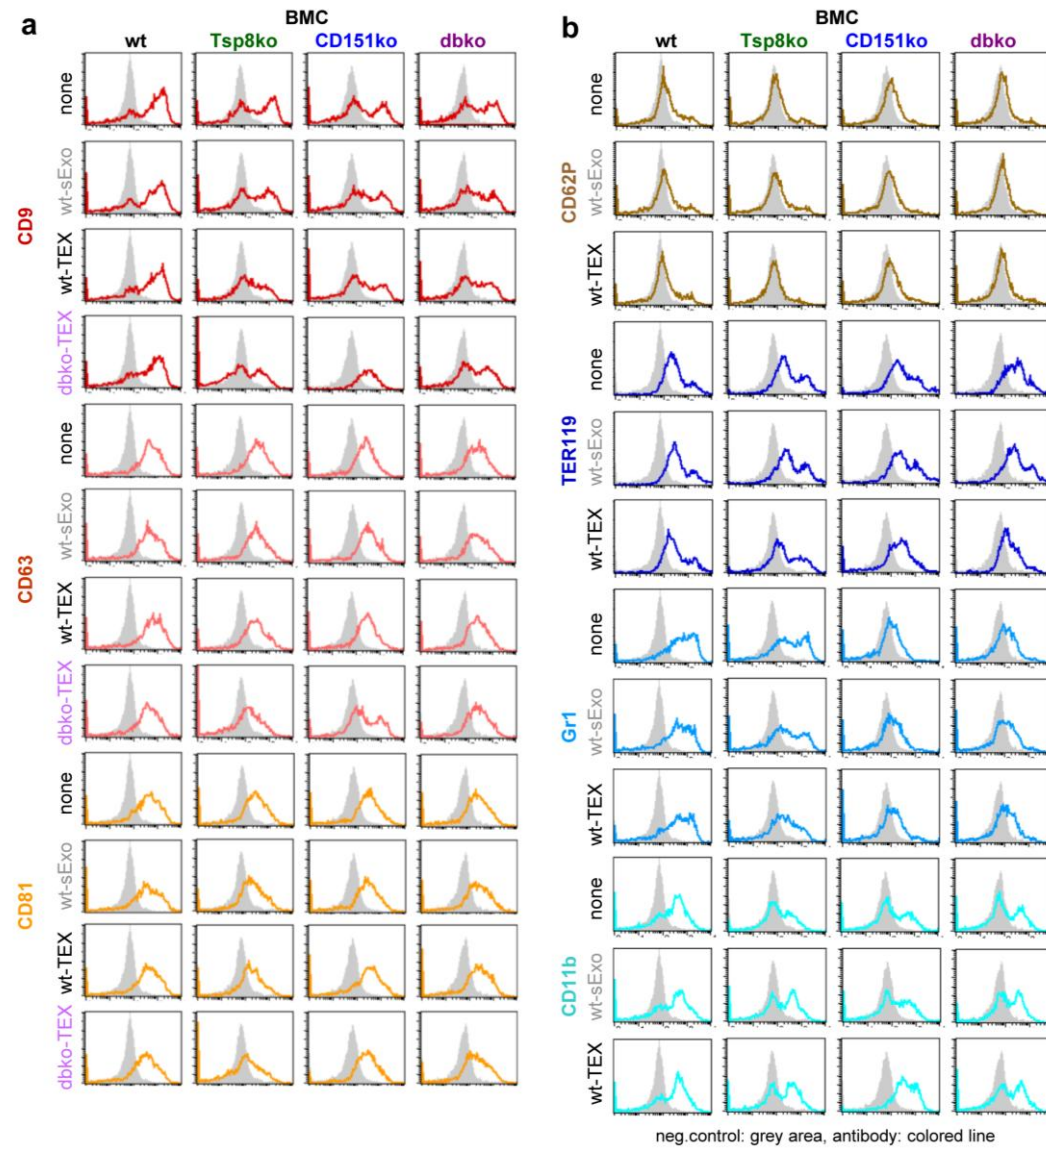

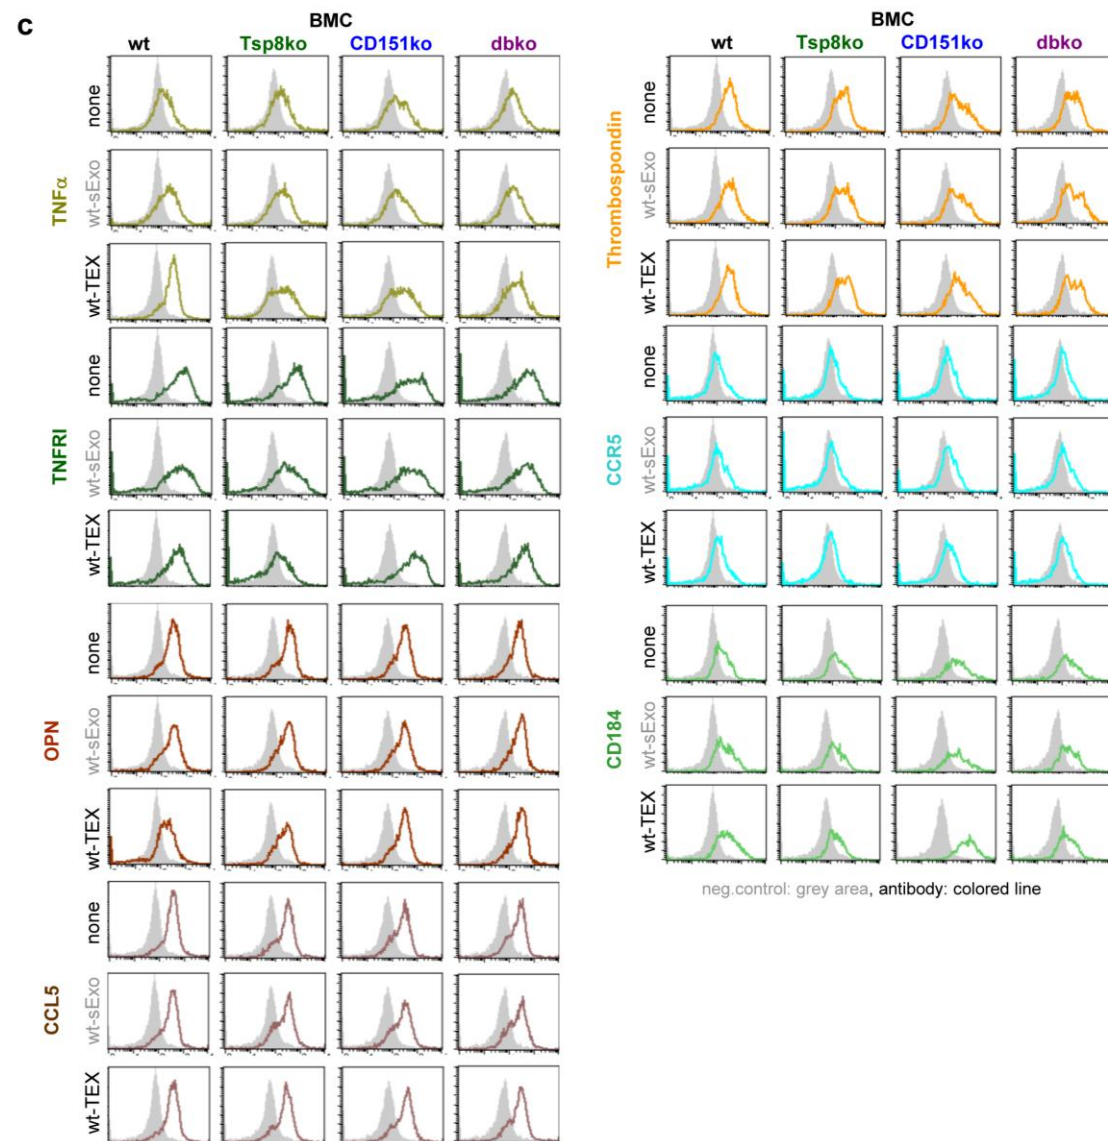

**Figure S7 Flow-cytometry examples on the impact of sExo and TEX uptake on BMC subpopulations.** BMC were incubated with wt-sExo and wt- and ko-TEX for 48h-72h. Recovery of BMC subpopulations was evaluated by flow-cytometry; representative examples of overlays with negative controls are shown for (a) CD9, CD63, CD81, (b) CD62P, TER119, Gr1, CD11b; (c) TNF $\alpha$ , TNFRI, OPN, CCL5, ThbSp, CCR5 and CD184.

Only in Tspan8ko-BMC CD9, CD63 and TNFRI expression is slightly reduced by wt-TEX; low CD62P and TER119 expression is impaired by coculture with TEX; CD11b and CD184 expression is unchanged or increased in wt-TEX-treated BMC.
